# Supplementary material for: Thermodynamic Feasibility of Hydrogen-Rich Gas Production Supported by Iron Based Chemical Looping Process
Source: Hindawi journal article supplement (doi:10.1155/2016/1764670), 2016-01-01
Supplement: f1 [file 1764670.f1.docx]

**Appendix:**

**Calculation methodology**

Chemical reaction may be represented as follows:

(a.1)

where Ri denotes the reagent i and ni denotes stoichiometric number.

The change of enthalpy for a reaction is calculated as a sum of enthalpies of all reagents multiplied by their stoichiometric numbers. The stoichiometric numbers of substrates are taken as negative:

(a.2)

where Hi(T) denotes the enthalpy of i-th reagent at the temperature T.

The enthalpy of the reagent at the temperature T can be found as follows:

(a.3)

where H298 is an enthalpy in standard conditions (T=25ºC (298.15 K) and p=1atm.), Cp is a molar heat under constant pressure and Htrans is heat of phase transformations (between temperatures of 25ºC and T). Cp is usually expressed as a polynomial, for example:

(a.4)

Change of Gibb’s free enthalpy can be calculated in a similar manner, namely:

(a.5)

The Gibb’s free enthalpy of the reagent at the temperature T can be found as follows:

(a.6)

And the entropy S(T) at the temperature T can be presented as follows:

(a.7)

Equilibrium constant K, can be calculated based on the equation:

(a.8)

Equilibrium constant K is a product of the activities of reaction reagents:

(a.9)

where ARi and ni denote chemical activities of i-th reagent, and reagents stoichiometric number, respectively. The stoichiometric number of substrates is taken as negative. In practice, the activity of solid reagents is one and the activity of gaseous reagents is equal to the reagent’s partial pressure divided by 1 atmosphere. Based on the above and (a.9) the composition of equilibrium atmosphere may be quantified.

When there is 1 mol of steam as a substrate and 1 mol of hydrogen as a product in the reactions of compound oxidation with steam, then K is given as follows:

(a.10)

Thus, the correlation between partial pressures of hydrogen and steam is given as:

(a.11)

If the atmosphere is composed solely of H2 and H2O, their shares in an equilibrium atmosphere can be found as:

(a.12)

(a.13)

The atmosphere composition in case of oxides reduction with carbon monoxide can be found in a similar way.

In case of oxides reduction with methane, K is given as:

(a.14)

If

(a.15)

and the atmosphere is composed of methane, carbon dioxide and steam

(a.16)

If the atmosphere is composed solely of CH4, CO and H2O, their shares in an equilibrium atmosphere can be found as:

(a.17)

(a.18)

(a.19)

The thermochemical tables provide H298, S298, Htrans and A, B, C and D coefficients values for Cp equation for specific chemical compound.
